# Supplementary material for: Conducting an Endoscopic Sinus Surgery Dissection Course via Telesimulation: An Initial Experience
Source: PubMed Central journal article supplement — OTO Open. 2022 Mar 4;6(1):2473974X221083981. doi: 10.1177/2473974X221083981 (PMC8902190; doi:10.1177/2473974x221083981), 2022-03-04
Supplement: sj-pdf-2-opn-10.1177_2473974X221083981.pdf [file sj-pdf-2-opn-10.1177_2473974X221083981.pdf]

**Survey on using Telesimulation in an  
Endoscopic Sinus Surgery Dissection Course**

Date: \_\_\_\_\_ Initials: \_\_\_\_\_

Age: \_\_\_\_\_

Gender:  Male  Female

Site: RVH/JGH

Have you ever participated in an Endoscopic Sinus Surgery dissection course? Yes/No

If yes, how many have you participated in? \_\_\_\_\_

How many of these courses were conducted using cadavers? \_\_\_\_\_

How many of these courses were conducted using 3D models? \_\_\_\_\_

For OTL-HNS TRAINEES: Level of training

PGY 1

PGY 4

PGY 2

PGY 5

PGY 3

Fellow (specify subspecialty): \_\_\_\_\_

**Having completed this dissection course, we would like to evaluate your comfort level with endoscopic sinus surgery both pre- and post-dissection course.**

1. Please select one response for each of the following statements.

| <b>PRE-DISSECTION COURSE, what was your COMFORT LEVEL with dissection of the following sinuses?</b> | <b>1. Requires complete hands-on guidance</b> | <b>2. Requires constant direction</b> | <b>3. Some independence Requires direction</b> | <b>4. Independent, supervisor in the room</b> | <b>5. Complete independence</b> |
|-----------------------------------------------------------------------------------------------------|-----------------------------------------------|---------------------------------------|------------------------------------------------|-----------------------------------------------|---------------------------------|
| 1.1 Maxillary sinus                                                                                 | <input type="checkbox"/>                      | <input type="checkbox"/>              | <input type="checkbox"/>                       | <input type="checkbox"/>                      | <input type="checkbox"/>        |
| 1.2 Ethmoid sinus                                                                                   | <input type="checkbox"/>                      | <input type="checkbox"/>              | <input type="checkbox"/>                       | <input type="checkbox"/>                      | <input type="checkbox"/>        |
| 1.3 Sphenoid sinus                                                                                  | <input type="checkbox"/>                      | <input type="checkbox"/>              | <input type="checkbox"/>                       | <input type="checkbox"/>                      | <input type="checkbox"/>        |
| 1.4 Frontal sinus                                                                                   | <input type="checkbox"/>                      | <input type="checkbox"/>              | <input type="checkbox"/>                       | <input type="checkbox"/>                      | <input type="checkbox"/>        |

2. Please select one response for each of the following statements.

| <b>POST-DISSECTION COURSE, what is now your COMFORT LEVEL with dissection of the following sinuses?</b> | <b>1. Requires complete hands-on guidance</b> | <b>2. Requires constant direction</b> | <b>3. Some independence Requires direction</b> | <b>4. Independent, supervisor in the room</b> | <b>5. Complete independence</b> |
|---------------------------------------------------------------------------------------------------------|-----------------------------------------------|---------------------------------------|------------------------------------------------|-----------------------------------------------|---------------------------------|
| 2.1 Maxillary sinus                                                                                     | <input type="checkbox"/>                      | <input type="checkbox"/>              | <input type="checkbox"/>                       | <input type="checkbox"/>                      | <input type="checkbox"/>        |
| 2.2 Ethmoid sinus                                                                                       | <input type="checkbox"/>                      | <input type="checkbox"/>              | <input type="checkbox"/>                       | <input type="checkbox"/>                      | <input type="checkbox"/>        |
| 2.3 Sphenoid sinus                                                                                      | <input type="checkbox"/>                      | <input type="checkbox"/>              | <input type="checkbox"/>                       | <input type="checkbox"/>                      | <input type="checkbox"/>        |
| 2.4 Frontal sinus                                                                                       | <input type="checkbox"/>                      | <input type="checkbox"/>              | <input type="checkbox"/>                       | <input type="checkbox"/>                      | <input type="checkbox"/>        |

### 3. TECHNOLOGY

We would like to know what your experience with the **TELESIMULATION SET UP** was. Please select one response for each of the following statements.

| Statement                                                                                          | 1. Strongly Disagree     | 2. Disagree              | 3. Neutral               | 4. Agree                 | 5. Strongly Agree        |
|----------------------------------------------------------------------------------------------------|--------------------------|--------------------------|--------------------------|--------------------------|--------------------------|
| 3.1<br>I can view the slides and dissection demonstration clearly                                  | <input type="checkbox"/> |
| 3.2<br>I could hear the lecturers clearly                                                          | <input type="checkbox"/> |
| 3.3<br>I could interact with the lecturers over telesimulation                                     | <input type="checkbox"/> |
| 3.4<br>I could hear the faculty clearly in the breakout room                                       | <input type="checkbox"/> |
| 3.5<br>I could interact with the faculty in the breakout room and get feedback over telesimulation | <input type="checkbox"/> |
| 3.6<br>I felt distracted by technology                                                             | <input type="checkbox"/> |
| Comments (optional):                                                                               |                          |                          |                          |                          |                          |

### 4. EDUCATION

We would like to know what your **LEARNING EXPERIENCE** was with **TELESIMULATION** instead of the traditional in-person dissection course. Please select one response for each of the following statements.

| Statement                                                                                                                          | 1. Strongly Disagree     | 2. Disagree              | 3. Neutral               | 4. Agree                 | 5. Strongly Agree        |
|------------------------------------------------------------------------------------------------------------------------------------|--------------------------|--------------------------|--------------------------|--------------------------|--------------------------|
| <b>Lectures</b>                                                                                                                    |                          |                          |                          |                          |                          |
| 4.1<br>The lectures met my learning objectives                                                                                     | <input type="checkbox"/> |
| <b>Breakout Room - Faculty</b>                                                                                                     |                          |                          |                          |                          |                          |
| 4.2<br>I felt engaged during the telesimulation                                                                                    | <input type="checkbox"/> |
| <b>Overall</b>                                                                                                                     |                          |                          |                          |                          |                          |
| 4.3<br>I would like this type of dissection course via <b>telesimulation</b> to be a larger component of my medical education      | <input type="checkbox"/> |
| 4.4<br>I believe this <b>telesimulation experience</b> added educational value above and beyond my learning from standard lectures | <input type="checkbox"/> |
| 4.5<br>I believe this type of dissection course conducted via <b>telesimulation</b> is an effective learning tool                  | <input type="checkbox"/> |
| 4.6<br>This dissection course conducted via                                                                                        | <input type="checkbox"/> |

|                                                                                                                 |                          |                          |                          |                          |                          |
|-----------------------------------------------------------------------------------------------------------------|--------------------------|--------------------------|--------------------------|--------------------------|--------------------------|
| <b>telesimulation</b> was beneficial to my learning                                                             |                          |                          |                          |                          |                          |
| 4.7<br>I would participate in this type of dissection course in the future.                                     | <input type="checkbox"/> |
| 4.8<br>Compared to participating in a traditional in-person dissection course, this was a reasonable substitute | <input type="checkbox"/> |
| Comments (optional):                                                                                            |                          |                          |                          |                          |                          |

**5. List three STRENGTHS of this telesimulation approach.**

**6. List three WEAKNESSES of this telesimulation approach.**

**7. Recommendations to improve on this telesimulation approach.**

**8. Comments:**

*Thank you for your time.*
